# Supplementary material for: The Prevalence, Epidemiological, and Molecular Characterization of Methicillin-Resistant Staphylococcus aureus (MRSA) in Macau (2017–2022)
Source: Microorganisms. 2024 Jan 12;12(1):148. doi: 10.3390/microorganisms12010148 (PMC10820975; doi:10.3390/microorganisms12010148)
Supplement: Supplementary file 1 [file microorganisms-12-00148-s001.zip › Supplemental tables_2023-12-14-final.xlsx]

## Sheet: Table S1
Table S1 Primer sequences and amplification conditions of all genes
Gene	Forward primer	Amplification conditions	Size/bp
	Reverse primer
SCCmec-I	GCTTTAAAGAGTGTCGTTACAGG	(94℃, 4min) + [(94℃, 30s) + (52℃, 45s) + (72℃, 1min)] × 30+ (72℃, 10min)	613
	GTTCTCTCATAGTATGACGTCC
SCCmec-II	CGTTGAAGATGATGAAGCG		398
	CGAAATCAATGGTTAATGGACC
SCCmec-III	CCATATTGTGTACGATGCG		280
	CCTTAGTTGTCGTAACAGATCG
SCCmec-IVa	GCCTTATTCGAAGAAACCG		776
	CTACTCTTCTGAAAAGCGTCG
SCCmec-IVb	TCTGGAATTACTTCAGCTGC		493
	AAACAATATTGCTCTCCCTC
SCCmec-IVc	ACAATATTTGTATTATCGGAGAGC		200
	TTGGTATGAGGTATTGCTGG
SCCmec-IVd	CTCAAAATACGGACCCCAATACA		881
	TGCTCCAGTAATTGCTAAAG
SCCmec-V	GAACATTGTTACTTAAATGAGCG		325
	TGAAAGTTGTACCCTTGACACC

## Sheet: Table S2
Table S2 MIC Breakpoints of antimicrobials for Staphylococcus aureus using VITEK-2
Antimicrobial	Resistant (μg/mL)	Susceptible (μg/mL)	Intermediate (μg/mL)
Cefoxitin	positive	negative
Benzylpenicillin	≧0.5	≦0.03
Oxacillin	≧4	≦0.25
Linezolid		2
Gentamicin	≧16	≦0.5	8
Ciprofloxacin	≧8	≦0.5
Levofloxacin	≧8	≦0.12	4
Moxifloxacin	≧8	≦0.25	4
Erythromycin	≧8	≦0.25	4
Clindamycin	≧8	≦0.25	1
Quinupristin		≦0.25
Vancomycin		≦0.5	4
Tetracycline	≧16	≦1
Tigecycline		≦0.12
Nitrofurantoin		≦16
Rifampicin		≦0.5	2
Note: Data retrieved from VITEK® 2 compact system. MICs (μg/mL) were interpreted as being in susceptible, intermediate, or resistant categories according to the breakpoints recommended by the VITEK® 2 AST cards standards. The criteria for determining Methicillin-resistant Staphylococcus aureus (MRSA) involve the positivity or negativity of Cefoxitin. A positive result indicates resistance, signif…

## Sheet: Table S3
Table S3 Antimicrobial susceptibility, their antimicrobial resistance profiles based on Clinical and Laboratory Standards Institute (CLSI) guidelines (2017)
Code	Year	Period	Season	Gender	Age	Inpatient	MRSA	Cefoxitin	Benzylpenicillin	Oxacillin	Gentamicin	Ciprofloxacin	Levofloxacin	Moxifloxacin	Erythromycin	Clindamycin	Quinupristin	Linezolid	Vancomycin	Tetracycline	Tigecycline	Nitrofurantoin	Rifampicin	SCC-I	SCC-II	SCC-III	SCC-IVa	SCC-IVb	SCC-IVc	SCC-IVd	SCC-V
1	2017	2017.09-2018.04		1	73	1	0	1	0	1	0	0	0	0	0	0	0	0	0	1	0	0	0	0	0	0	0	0	0	0	0
2	2017	2017.09-2018.04		1	68	1	0	1	0	1	1	0	0	1	0	0	1	1	1	1	1	1	0	0	0	0	0	0	0	0	0
3	2017	2017.09-2018.04		1	60	2	0	1	0	1	1	0	0	1	1	1	1	1	1	0	1	1	0	0	0	0	0	0	0	0	0
4	2017	2017.09-2018.04		1	0.25	2	0	1	0	1	1	0	0	1	1	1	1	1	1	1	1	1	0	0	0	0	0	0	0	0	0
5	2017	2017.09-2018.04		2	82	0	0	1	1	1	1	0	0	1	1	1	1	1	1	1	1	1	0	0	0	0	0	0	0	0	0
6	2017	2017.09-2018.04		1	30	2	1	0	0	0	1	0	0	1	1	1	1	1	1	1	1	1	0	0	0	0	0	0	0	0	1
7	2017	2017.09-2018.04		1	0.33	2	0	1	0	1	1	0	0	1	1	1	1	1	1	0	1	1	0	0	0	0	0	0	0	0	0
8	2017	2017.09-2018.04		1	17	2	0	1	0	1	1	0	0	1	1	1	1	1	1	1	1	1	0	0	0	0	0	0	0	0	0
9	2017	2017.09-2018.04		2	26	2	0	1	0	1	1	0	0	1	1	1	1	1	1	1	1	1	0	0	0	0	0	0	0	0	0
10	2017	2017.09-2018.04		2	84	1	1	0	0	0	1	1	1	0	0	0	1	1	1	1	1	1	0	0	0	0	0	1	0	0	0
11	2017	2017.09-2018.04		1	49	2	0	1	0	1	1	0	0	1	0	0	1	1	1	1	1	1	0	0	0	0	0	0	0	0	0
12	2017	2017.09-2018.04		2	89	1	1	0	0	0	0	0	1	0	0	0	0	1	1	0	1	1	0	0	0	0	0	0	0	0	1
13	2017	2017.09-2018.04		1	84	1	0	1	0	1	0	1	2	1	0	1	1	1	1	1	1	1	0	0	0	0	0	0	0	0	0
14	2017	2017.09-2018.04		2	40	0	0	1	0	1	1	0	0	1	1	1	1	1	1	1	1	1	0	0	0	0	0	0	0	0	0
15	2017	2017.09-2018.04		2	24	2	0	1	0	1	1	0	0	1	1	1	1	1	1	1	1	1	0	0	0	0	0	0	0	0	0
16	2017	2017.09-2018.04		1	59	1	0	1	0	1	1	0	0	1	1	1	1	1	1	0	1	1	0	0	0	0	0	0	0	0	0
17	2017	2017.09-2018.04		1	69	1	0	1	0	1	1	0	0	1	0	0	1	1	1	0	1	1	0	0	0	0	0	0	0	0	0
18	2017	2017.09-2018.04		2	62	0	0	1	0	1	1	0	0	1	1	1	1	1	1	1	1	1	0	0	0	0	0	0	0	0	0
19	2017	2017.09-2018.04		1	56	1	0	1	0	1	1	0	0	1	1	1	1	1	1	0	1	1	0	0	0	0	0	0	0	0	0
20	2017	2017.09-2018.04		1	25	2	0	1	0	1	1	1	2	1	1	1	1	1	1	1	1	1	0	0	0	0	0	0	0	0	0
21	2017	2017.09-2018.04		1	78	1	0	1	1	1	1	0	0	1	0	0	1	1	1	1	1	1	0	0	0	0	0	0	0	0	0
22	2017	2017.09-2018.04		1	79	1	0	1	0	1	1	0	0	1	0	0	1	1	1	1	1	1	0	0	0	0	0	0	0	0	0
23	2017	2017.09-2018.04		1	87	1	1	0	0	0	0	1	2	1	1	1	1	1	1	1	1	1	0	0	0	0	0	0	0	0	1
24	2017	2017.09-2018.04		2	24	2	0	1	0	1	1	0	0	1	1	1	1	1	1	0	1	1	0	0	0	0	0	0	0	0	0
25	2017	2017.09-2018.04		2	24	1	0	1	0	1	1	0	0	1	0	0	1	1	1	0	1	1	0	0	0	0	0	0	0	0	0
26	2017	2017.09-2018.04		2	82	1	0	1	1	1	1	0	0	1	1	1	1	1	1	1	1	1	0	0	0	0	0	0	0	0	0
27	2017	2017.09-2018.04		1	24	1	0	1	0	1	1	0	0	1	1	1	1	1	1	0	1	1	0	0	0	0	0	0	0	0	0
28	2017	2017.09-2018.04		2	42	1	0	1	1	1	1	0	0	1	0	0	1	1	1	1	1	1	0	0	0	0	0	0	0	0	0
29	2017	2017.09-2018.04		2	1	1	1	0	0	0	0	1	2	1	2	1	1	1	1	1	1	1	0	0	0	1	0	0	0	0	0
30	2017	2017.09-2018.04		1	0.08	2	0	1	0	1	1	0	0	1	1	1	1	1	1	1	1	1	0	0	0	0	0	0	0	0	0
31	2017	2017.09-2018.04		2	0.16	2	0	1	0	1	1	0	0	1	0	0	1	1	1	1	1	1	0	0	0	0	0	0	0	0	0
32	2017	2017.09-2018.04		2	0.91	2	0	1	0	1	1	0	0	1	0	0	1	1	1	1	1	1	0	0	0	0	0	0	0	0	0
33	2017	2017.09-2018.04		2	31	2	0	1	0	1	1	0	0	1	0	0	1	1	1	1	1	1	0	0	0	0	0	0	0	0	0
34	2017	2017.09-2018.04	Winter	1	62	1	1	0	0	0	0	1	1	2	0	0	1	1	1	1	1	1	0	0	1	0	0	0	0	0	0
35	2017	2017.09-2018.04		2	1	1	1	0	0	0	0	1	2	1	2	1	1	1	1	1	1	1	0	0	0	1	0	0	0	0	0
36	2017	2017.09-2018.04	Winter	2	0.25	2	0	1	0	1	1	0	0	1	1	1	1	1	1	1	1	1	0	0	0	0	0	0	0	0	0
37	2017	2017.09-2018.04	Winter	2	51	2	0	1	0	1	0	0	0	1	0	0	1	1	1	0	1	1	0	0	0	0	0	0	0	0	0
38	2017	2017.09-2018.04	Winter	1	0.41	2	0	1	1	1	1	0	0	1	1	1	1	1	1	1	1	1	0	0	0	0	0	0	0	0	0
39	2017	2017.09-2018.04	Winter	1	4	2	0	1	0	1	1	0	0	1	0	0	1	1	1	1	1	1	0	0	0	0	0	0	0	0	0
40	2017	2017.09-2018.04	Winter	1	54	1	0	1	0	1	1	0	0	1	1	1	1	1	1	1	1	1	0	0	0	0	0	0	0	0	0
41	2017	2017.09-2018.04	Winter	2	49	1	0	1	0	1	1	0	0	1	1	1	1	1	1	1	1	1	0	0	0	0	0	0	0	0	0
42	2017	2017.09-2018.04	Winter	1	51	1	1	0	0	0	2	1	2	1	1	1	1	1	1	1	1	1	0	0	0	0	0	0	0	0	1
43	2017	2017.09-2018.04	Winter	2	97	1	0	1	0	1	1	0	0	1	1	1	1	1	1	1	1	1	0	0	0	0	0	0	0	0	0
44	2017	2017.09-2018.04	Winter	1	92	1	1	0	0	0	1	1	1	0	0	0	1	1	1	1	1	1	0	0	0	0	0	1	0	0	0
45	2017	2017.09-2018.04	Winter	1	55	1	0	1	0	1	1	0	0	1	1	1	1	1	1	1	1	1	0	0	0	0	0	0	0	0	0
46	2017	2017.09-2018.04	Winter	2	6	2	0	1	0	1	1	0	0	1	1	1	1	1	1	1	1	1	0	0	0	0	0	0	0	0	0
47	2017	2017.09-2018.04	Winter	1	0.16	2	0	1	1	1	1	0	0	1	1	1	1	1	1	1	1	1	0	0	0	0	0	0	0	0	0
48	2017	2017.09-2018.04	Winter	1	84	0	1	0	0	0	0	1	2	1	0	1	1	1	1	1	1	1	0	0	1	0	0	0	0	0	0
49	2017	2017.09-2018.04	Winter	1	2	1	1	0	0	0	0	1	2	1	0	1	1	1	1	1	1	1	0	0	0	0	0	0	0	0	0
50	2017	2017.09-2018.04	Winter	1	55	1	0	1	1	1	1	0	0	1	1	1	1	1	1	0	1	1	0	0	0	0	0	0	0	0	0
51	2017	2017.09-2018.04	Winter	1	79	1	1	0	0	0	1	0	0	1	1	1	1	1	1	1	1	1	2	0	0	0	0	0	0	0	0
52	2017	2017.09-2018.04	Winter	1	86	1	0	1	1	1	1	1	1	2	0	0	1	1	1	1	1	1	0	0	0	0	0	0	0	0	0
53	2017	2017.09-2018.04		2	80	1	1	0	0	0	1	0	0	1	0	0	1	1	1	0	1	1	0	0	0	0	0	0	0	0	1
54	2017	2017.09-2018.04	Winter	2	0.33	2	0	1	0	1	1	0	0	1	0	0	0	1	1	2	1	1	0	0	0	0	0	0	0	0	0
55	2017	2017.09-2018.04	Winter	2	84	1	0	1	0	1	1	0	0	1	1	1	1	1	1	1	1	1	0	0	0	0	0	0	0	0	0
56	2017	2017.09-2018.04	Winter	1	26	1	1	0	0	0	1	0	0	1	0	0	1	1	1	1	1	1	0	0	0	0	0	0	0	0	1
57	2017	2017.09-2018.04	Winter	2	84	1	0	1	0	1	1	0	0	1	1	1	1	1	1	1	1	1	0	0	0	0	0	0	0	0	0
58	2017	2017.09-2018.04	Winter	2	44	1	0	1	1	1	1	0	0	1	1	1	1	1	0	1	1	2	0	0	0	0	0	0	0	0	0
59	2017	2017.09-2018.04	Winter	1	37	2	1	0	0	0	1	0	0	1	0	0	1	1	1	0	1	1	0	0	0	0	0	1	0	0	0
60	2017	2017.09-2018.04	Winter	1	42	0	0	1	0	1	1	0	0	1	0	0	1	1	1	1	1	1	0	0	0	0	0	0	0	0	0
61	2017	2017.09-2018.04	Winter	1	59	1	0	1	0	1	2	0	0	1	0	0	1	1	1	1	1	1	0	0	0	0	0	0	0	0	0
62	2017	2017.09-2018.04	Winter	2	30	2	0	1	0	1	1	0	0	1	1	1	1	1	1	1	1	1	0	0	0	0	0	0	0	0	0
63	2017	2017.09-2018.04	Winter	2	0.25	2	0	1	0	1	1	0	0	1	1	1	1	1	1	0	1	1	0	0	0	0	0	0	0	0	0
64	2017	2017.09-2018.04	Winter	2	59	2	0	1	0	1	1	0	0	1	0	0	1	1	1	1	1	1	0	0	0	0	0	0	0	0	0
65	2017	2017.09-2018.04	Winter	1	9	0	0	1	0	1	1	0	0	1	0	0	1	1	1	1	1	1	0	0	0	0	0	0	0	0	0
66	2017	2017.09-2018.04	Winter	1	32	1	0	1	0	1	1	0	0	1	1	1	1	1	1	1	1	1	0	0	0	0	0	0	0	0	0
67	2017	2017.09-2018.04	Winter	1	22	2	0	1	0	1	1	0	0	1	0	0	1	1	1	1	1	1	0	0	0	0	0	0	0	0	0
68	2017	2017.09-2018.04	Winter	2	9	2	0	1	0	1	1	0	0	1	0	0	1	1	1	1	1	1	0	0	0	0	0	0	0	0	0
69	2017	2017.09-2018.04	Winter	1	0.16	2	0	1	0	1	1	0	0	1	1	1	1	1	1	1	1	1	0	0	0	0	0	0	0	0	0
70	2017	2017.09-2018.04	Winter	2	60	2	1	0	0	0	1	0	0	1	0	0	1	1	1	0	1	1	0	0	0	0	0	0	0	1	0
71	2017	2017.09-2018.04	Winter	1	92	1	1	0	0	0	1	1	1	0	0	0	1	1	1	1	1	1	0	0	0	0	0	1	0	0	0
72	2017	2017.09-2018.04	Winter	2	5	2	0	1	0	1	0	0	0	1	0	0	1	1	1	1	1	1	0	0	0	0	0	0	0	0	0
73	2017	2017.09-2018.04	Winter	1	64	1	0	1	1	1	1	0	0	1	1	1	1	1	1	1	1	1	0	0	0	0	0	0	0	0	0
74	2017	2017.09-2018.04	Winter	2	31	1	0	1	0	1	1	0	0	1	1	1	1	1	1	0	1	1	0	0	0	0	0	0	0	0	0
75	2017	2017.09-2018.04	Winter	1	0.58	2	0	1	1	1	1	0	0	1	1	1	1	1	1	1	1	1	0	0	0	0	0	0	0	0	0
76	2017	2017.09-2018.04	Winter	1	26	2	0	1	0	1	1	0	0	1	1	1	1	1	1	0	1	1	0	0	0	0	0	0	0	0	0
77	2017	2017.09-2018.04	Winter	1	87	1	1	0	0	0	0	1	1	2	1	1	1	1	1	1	1	1	0	0	0	0	0	0	0	0	1
78	2017	2017.09-2018.04	Winter	2	25	2	0	1	0	1	1	0	1	1	1	1	1	1	1	0	1	1	0	0	0	0	0	0	0	0	0
79	2017	2017.09-2018.04	Winter	1	60	2	0	1	0	1	1	0	0	1	0	0	1	1	1	1	1	1	0	0	0	0	0	0	0	0	0
80	2017	2017.09-2018.04	Winter	1	85	0	0	1	1	1	1	0	0	1	1	1	1	1	1	1	1	1	0	0	0	0	0	0	0	0	0
81	2017	2017.09-2018.04	Winter	1	86	1	1	0	0	0	1	1	2	1	0	1	1	1	1	1	1	1	0	0	0	0	0	1	0	0	0
82	2017	2017.09-2018.04	Winter	1	1	2	0	1	0	1	1	0	0	1	1	1	1	1	1	1	1	1	0	0	0	0	0	0	0	0	0
83	2017	2017.09-2018.04	Winter	1	98	1	1	0	0	0	1	1	1	0	0	0	1	1	1	1	1	1	0	0	1	0	0	0	0	0	0
84	2017	2017.09-2018.04	Winter	1	64	1	0	1	1	1	1	0	0	1	1	1	1	1	1	1	1	1	0	0	0	0	0	0	0	0	0
85	2017	2017.09-2018.04	Winter	1	72	2	0	1	0	1	1	1	1	0	1	1	1	1	1	1	1	1	0	0	0	0	0	0	0	0	0
86	2017	2017.09-2018.04	Winter	1	71	1	0	1	0	1	0	1	1	2	0	0	1	1	1	1	1	1	0	0	0	0	0	0	0	0	0
87	2017	2017.09-2018.04	Winter	1	63	1	0	1	0	1	1	0	0	1	0	1	1	1	1	1	1	1	0	0	0	0	0	0	0	0	0
88	2017	2017.09-2018.04	Winter	2	53	2	0	1	0	1	1	0	0	1	1	1	1	1	1	1	1	1	0	0	0	0	0	0	0	0	0
89	2018	2017.09-2018.04	Winter	2	53	1	1	0	0	0	1	0	0	1	0	0	1	1	1	1	1	1	0	0	0	0	0	0	1	0	0
90	2018	2017.09-2018.04	Winter	1	92	1	0	1	0	1	0	0	0	1	1	1	1	1	1	0	1	1	0	0	0	0	0	0	0	0	0
91	2018	2017.09-2018.04	Winter	2	62	1	0	1	0	1	1	0	0	1	1	1	1	1	1	1	1	1	0	0	0	0	0	0	0	0	0
92	2018	2017.09-2018.04	Winter	1	0.41	2	0	1	0	1	1	0	0	1	1	1	1	1	1	0	1	1	0	0	0	0	0	0	0	0	0
93	2018	2017.09-2018.04	Winter	1	56	1	0	1	0	1	1	0	0	1	1	1	1	1	1	1	1	1	0	0	0	0	0	0	0	0	0
94	2018	2017.09-2018.04	Winter	1	56	1	0	1	0	1	1	0	0	1	1	1	1	1	1	1	1	1	0	0	0	0	0	0	0	0	0
95	2018	2017.09-2018.04	Winter	2	3	2	1	0	0	0	1	0	0	1	0	1	1	1	1	1	1	1	0	0	1	0	0	0	0	0	0
96	2018	2017.09-2018.04	Winter	1	0.33	2	1	0	0	0	2	0	0	1	0	1	1	1	1	1	1	1	0	0	1	0	0	0	0	0	0
97	2018	2017.09-2018.04	Spring	1	60	1	1	0	0	0	0	1	1	2	0	0	1	1	1	1	1	1	0	0	1	0	0	0	0	0	0
98	2018	2017.09-2018.04	Winter	1	87	1	1	0	0	0	2	1	1	0	0	1	1	1	1	1	1	1	0	0	1	0	0	0	0	0	0
99	2018	2017.09-2018.04	Winter	1	31	2	1	0	0	0	1	0	0	1	0	0	1	1	1	1	1	1	0	0	1	0	0	0	0	0	0
100	2018	2017.09-2018.04	Winter	1	0.04	1	0	1	0	1	1	0	0	1	1	1	1	1	1	1	1	1	0	0	0	0	0	0	0	0	0
101	2018	2017.09-2018.04	Winter	1	85	1	1	0	0	0	0	1	1	2	0	0	1	1	1	1	1	1	0	0	0	0	0	0	0	0	1
102	2018	2017.09-2018.04	Winter	2	45	2	0	1	0	1	1	0	0	1	0	0	1	1	1	1	1	1	0	0	0	0	0	0	0	0	0
103	2018	2017.09-2018.04	Winter	1	0.25	2	0	1	1	1	1	0	0	1	0	0	1	1	1	1	1	1	0	0	0	0	0	0	0	0	0
104	2018	2017.09-2018.04	Winter	1	87	1	1	0	0	0	2	1	2	1	1	1	1	1	1	1	1	1	0	0	0	1	0	0	0	0	0
105	2018	2017.09-2018.04	Winter	1	50	2	0	1	0	1	1	0	0	1	0	0	1	1	1	0	1	1	0	0	0	0	0	0	0	0	0
106	2018	2017.09-2018.04	Winter	1	98	1	1	0	0	0	1	1	1	0	0	1	1	1	1	1	1	1	0	0	1	0	0	0	0	0	0
107	2018	2017.09-2018.04	Winter	1	0.08	1	0	1	1	1	1	0	0	1	1	1	1	1	1	1	1	1	0	0	0	0	0	0	0	0	0
108	2018	2017.09-2018.04	Winter	1	64	1	1	0	0	0	0	1	1	2	0	0	1	1	1	0	1	1	0	0	0	1	0	0	0	0	0
109	2018	2017.09-2018.04	Winter	1	71	1	1	0	0	0	1	1	1	2	1	1	1	1	0	1	1	1	0	0	0	1	0	0	0	0	0
110	2018	2017.09-2018.04	Spring	2	0.25	2	1	0	0	0	1	0	0	1	1	1	1	1	1	0	1	1	0	0	0	0	0	1	0	0	0
111	2018	2017.09-2018.04	Spring	1	48	1	0	1	0	1	1	0	0	1	1	1	1	1	1	1	1	1	0	0	0	0	0	0	1	0	0
112	2018	2017.09-2018.04	Spring	1	32	1	0	1	1	1	1	0	0	1	1	1	1	1	1	1	1	1	0	0	0	1	0	0	0	0	0
113	2018	2017.09-2018.04	Spring	1	87	1	1	0	0	0	2	1	2	1	1	1	1	1	1	1	1	1	0	0	0	0	0	0	0	0	0
114	2018	2017.09-2018.04	Spring	1	93	1	1	0	0	0	1	1	1	2	0	1	1	1	1	0	1	1	0	0	0	0	0	1	0	0	0
115	2018	2017.09-2018.04	Spring	2	83	1	1	0	0	0	0	0	1	2	0	0	1	1	1	1	1	1	0	0	0	0	0	1	0	0	0
116	2018	2017.09-2018.04	Spring	2	0.33	2	1	0	0	0	0	0	1	2	0	0	1	1	1	1	1	1	0	0	0	0	1	0	0	0	0
117	2018	2017.09-2018.04	Spring	2	68	1	1	0	0	0	0	1	1	0	0	1	1	1	1	1	1	1	0	0	1	0	0	0	0	0	0
118	2018	2017.09-2018.04	Spring	1	95	1	1	0	0	0	0	1	1	0	0	0	1	1	1	0	1	1	0	0	0	0	0	1	0	0	0
119	2018	2017.09-2018.04	Spring	2	86	1	0	1	0	1	1	0	0	1	1	1	1	1	1	0	1	1	0	0	0	0	0	0	0	0	0
120	2018	2017.09-2018.04	Spring	2	48	2	1	0	0	0	1	0	0	1	1	0	1	1	1	1	1	1	0	0	0	0	0	0	0	1	0
121	2018	2017.09-2018.04	Spring	2	44	2	1	0	0	0	1	0	0	1	1	1	1	1	1	1	1	1	0	0	0	0	0	0	0	0	0
122	2018	2017.09-2018.04	Spring	1	0.5	2	0	1	0	1	1	0	0	1	0	0	1	1	1	0	1	1	0	0	0	0	0	0	0	0	0
123	2018	2017.09-2018.04	Spring	1	0.33	2	0	1	0	1	1	0	0	1	1	1	1	1	1	1	1	1	0	0	0	0	0	0	0	0	0
124	2018	2017.09-2018.04	Spring	2	90	1	0	1	1	1	1	0	0	1	0	0	1	1	1	0	1	1	0	0	0	0	0	0	0	0	0
125	2018	2017.09-2018.04	Spring	2	31	2	0	1	0	1	1	0	0	1	1	1	1	1	1	1	1	1	0	0	0	0	0	0	0	0	0
126	2018	2017.09-2018.04	Spring	1	1	1	0	1	0	1	1	0	0	1	0	0	1	1	1	1	1	1	0	0	0	0	0	0	0	0	0
127	2018	2017.09-2018.04	Spring	1	8	1	0	1	0	1	1	0	0	1	0	0	1	1	1	1	1	1	0	0	0	0	0	0	0	0	0
128	2018	2017.09-2018.04	Spring	1	95	1	1	0	0	0	0	0	1	0	0	0	1	1	1	0	1	1	0	0	0	0	0	1	0	0	0
129	2018	2017.09-2018.04	Spring	2	26	1	0	1	0	1	1	0	0	1	1	1	1	1	1	1	1	1	0	0	0	0	0	0	0	0	0
130	2018	2017.09-2018.04	Spring	2	0.75	2	0	1	1	1	1	0	0	1	1	1	1	1	1	1	1	1	0	0	0	0	0	0	0	0	0
131	2018	2017.09-2018.04	Spring	1	63	2	0	1	0	1	1	0	0	1	1	1	1	1	1	1	1	1	0	0	0	0	0	0	0	0	0
132	2018	2017.09-2018.04	Spring	2	64	1	0	1	0	1	1	0	0	1	1	1	1	1	1	1	1	1	0	0	0	0	0	0	0	0	0
133	2018	2017.09-2018.04	Spring	1	84	1	0	1	0	1	1	0	0	1	1	1	1	1	1	1	1	1	0	0	0	0	0	0	0	0	0
134	2018	2017.09-2018.04	Spring	2	88	0	0	1	0	1	1	0	0	1	0	0	1	1	1	1	1	1	0	0	0	0	0	0	0	0	0
135	2018	2017.09-2018.04	Spring	1	0.25	2	0	1	0	1	1	0	0	1	1	1	1	1	1	1	1	1	0	0	0	0	0	0	0	0	0
136	2018	2017.09-2018.04	Spring	1	0.33	2	0	1	0	1	1	0	0	1	1	1	1	1	1	1	1	1	0	0	0	0	0	0	0	0	0
137	2018	2017.09-2018.04	Spring	1	0.41	2	0	1	0	1	1	0	0	1	1	1	1	1	1	1	1	1	0	0	0	0	0	0	0	0	0
138	2018	2017.09-2018.04	Spring	2	0.5	2	0	1	1	1	1	0	0	1	1	1	1	1	1	1	1	1	0	0	0	0	0	0	0	0	0
139	2018	2017.09-2018.04	Spring	1	86	1	0	1	0	1	1	0	0	1	1	1	1	1	1	1	1	1	0	0	0	0	0	0	0	0	0
140	2018	2017.09-2018.04	Spring	1	53	1	0	1	0	1	1	1	2	1	1	1	1	1	1	1	1	1	0	0	0	0	0	0	0	0	0
141	2018	2017.09-2018.04	Spring	2	79	0	1	0	0	0	1	0	0	1	1	1	1	1	1	1	1	1	0	0	0	0	0	0	1	0	0
142	2018	2017.09-2018.04	Spring	2	58	1	0	1	1	1	1	0	0	1	1	1	1	1	1	0	1	1	0	0	0	0	0	0	0	0	0
143	2018	2017.09-2018.04	Spring	1	70	0	1	0	0	0	1	1	2	1	1	1	1	1	1	1	1	1	0	0	0	0	0	1	0	0	0
144	2018	2017.09-2018.04	Spring	1	63	1	1	0	0	0	0	1	1	2	0	0	1	1	1	0	1	1	0	0	0	0	0	1	0	0	0
145	2018	2017.09-2018.04	Spring	2	32	1	0	1	1	1	1	0	0	2	0	0	1	1	1	1	1	1	0	0	0	0	0	0	0	0	0
146	2018	2017.09-2018.04	Spring	2	28	1	0	1	0	1	1	0	0	1	1	1	1	1	1	1	1	1	0	0	0	0	0	0	0	0	0
147	2018	2017.09-2018.04	Spring	1	86	1	1	0	0	0	1	1	1	2	0	0	1	1	1	0	1	1	0	0	0	0	0	1	0	0	0
148	2018	2017.09-2018.04	Spring	2	44	1	0	1	1	1	1	0	0	1	1	1	1	1	1	1	1	1	0	0	0	0	0	0	0	0	0
149	2018	2017.09-2018.04	Spring	2	70	1	0	1	1	1	1	0	0	1	1	1	1	1	1	1	1	1	0	0	0	0	0	0	0	0	0
150	2018	2017.09-2018.04	Spring	1	4	2	0	1	0	1	1	0	0	1	0	0	1	1	1	1	1	1	0	0	0	0	0	0	0	0	0
151	2018	2017.09-2018.04	Spring	1	70	2	0	1	0	1	1	0	0	1	1	1	1	1	1	1	1	1	0	0	0	0	0	0	0	0	0
152	2018	2017.09-2018.04	Spring	2	77	1	0	1	0	1	1	0	0	1	1	1	1	1	1	1	1	1	0	0	0	0	0	0	0	0	0
153	2018	2017.09-2018.04	Spring	1	40	1	0	1	0	1	1	0	0	1	1	1	1	1	1	1	1	1	0	0	0	0	0	0	0	0	0
154	2018	2017.09-2018.04	Spring	1	39	1	0	1	1	1	1	0	0	1	1	1	1	1	1	1	1	1	0	0	0	0	0	0	0	0	0
155	2018	2017.09-2018.04	Spring	1	0.41	2	0	1	1	1	1	0	0	1	1	1	1	1	1	1	1	1	0	0	0	0	0	0	0	0	0
156	2018	2017.09-2018.04	Spring	2	33	2	0	1	0	1	1	0	0	1	1	1	1	1	1	0	1	1	0	0	0	0	0	0	0	0	0
157	2018	2017.09-2018.04	Spring	1	63	1	1	0	0	0	0	1	1	2	0	0	1	1	1	0	1	1	0	0	0	0	0	1	0	0	0
158	2018	2017.09-2018.04	Spring	1	0.91	0	0	1	1	1	1	0	0	1	1	1	1	1	1	1	1	1	0	0	0	0	0	0	0	0	0
159	2018	2017.09-2018.04	Spring	1	88	1	0	1	1	1	1	0	0	1	1	1	1		1		1	1	0	0	0	0	0	0	0	0	0
160	2018	2017.09-2018.04	Spring	1	34	1	0	1	1	1	1	0	0	1	0	1	1	1	1	1	1	1	0	0	0	0	0	0	0	0	0
161	2018	2017.09-2018.04	Spring	2	27	1	1	0	0	0	1	0	0	1	0	0	1	1	1	1	1	1	0	0	0	0	0	0	0	0	1
162	2018	2017.09-2018.04	Spring	1	1	2	0	1	1	1	1	0	0	1	0	1	1	1	1	1	1	1	0	0	0	0	0	0	0	0	0
163	2018	2017.09-2018.04	Spring	2	0.58	2	0	1	1	1	1	0	0	1	1	1	1	1	1	1	1	1	0	0	0	0	0	0	0	0	0
164	2018	2017.09-2018.04	Spring	2	9	2	0	1	1	1	1	0	0	1	1	1	1	1	1	1	1	1	0	0	0	0	0	0	0	0	0
165	2018	2017.09-2018.04	Spring	1	87	1	0	1	0	1	1	1	1	2	0	0	1	1	1	1	1	1	0	0	0	0	0	0	0	0	0
166	2018	2017.09-2018.04	Spring	2	0.04	0	0	1	0	1	1	0	0	1	0	0	1	1	1	1	1	1	0	0	0	0	0	0	0	0	0
167	2018	2017.09-2018.04	Spring	1	80	1	0	1	0	1	0	1	2	1	0	1	1	1	1	1	1	1	0	0	0	0	0	0	0	0	0
168	2018	2017.09-2018.04	Spring	2	82	1	0	1	0	1	1	0	0	1		1	1	1	1	1	1	1	0	0	0	0	0	0	0	0	0
169	2018	2017.09-2018.04	Spring	1	84	1	1	0	0	0	0	1	1	2	0	0	1	1	1	1	1	1	0	0	0	0	0	0	0	0	0
170	2018	2017.09-2018.04	Spring	1	55	1	1	0	0	0	1	0	0	1	1	1	1	1	1	1	1	1	0	0	1	0	0	0	0	0	0
171	2018	2017.09-2018.04	Spring	1	51	1	1	0	0	0	1	0	0	1	1	1	1	1	1	1	1	1	0	0	0	1	0	0	0	0	0
172	2018	2017.09-2018.04	Spring	2	92	1	1	0	0	0	0	1	1	2	0	0	1	1	1	0	1	1	0	0	0	0	0	0	0	0	0
173	2018	2017.09-2018.04	Spring	1	71	1	1	0	0	0	1	1	2	1	1	1	1	1	1	1	1	1	0	0	0	0	0	0	0	0	0
174	2018	2018.09-2019.04		1	72	1	0	1	0	1	2	0	2	1	0	0	1	1	1	1	1	1	1	0	0	0	0	0	0	0	0
175	2018	2018.09-2019.04		1	86	1	0	1	0	1	0	0	0	2	0	1	1	1	1	1	1	1	1	0	0	0	0	0	0	0	0
176	2018	2018.09-2019.04		1	88	1	1	0	0	0	0	0	2	1	1	1	1	1	1	1	1	1	1	0	0	0	0	0	0	0	1
177	2018	2018.09-2019.04		1	29	1	1	0	0	0	1	1	1	1	0	0	1	1	1	0	1	1	1	0	0	1	0	0	0	0	0
178	2018	2018.09-2019.04		1	99	1	1	0	0	0	0	0	0	2	0	0	1	1	1	1	1	1	1	0	0	0	0	0	0	0	1
179	2018	2018.09-2019.04		1	84	1	1	0	0	0	1	0	0	0	0	0	1	1	1	1	1	1	1	0	1	0	0	0	1	0	0
180	2018	2018.09-2019.04	Winter	2	65	1	1	0	0	0	0	0	0	2	0	0	1	1	1	1	1	1	1	0	0	0	0	0	0	0	1
181	2018	2018.09-2019.04	Winter	1	71	1	1	0	0	0	2	0	0	2	0	1	1	1	1	1	1	1	1	0	0	0	0	0	0	0	1
182	2018	2018.09-2019.04	Winter	1	94	1	1	0	0	0	0	0	0	2	0	0	1	1	1	0	1	1	1	0	0	0	0	0	0	0	1
183	2018	2018.09-2019.04	Winter	1	86	1	1	0	0	0	0	0	0	2	0	0	1	1	1	1	1	1	1	0	0	1	0	0	0	0	0
184	2018	2018.09-2019.04	Winter	2	84	2	1	0	0	0	0	0	0	0	0	0	1	1	1	1	1	1	1	0	0	0	0	0	0	0	0
185	2019	2018.09-2019.04	Winter	1	54	2	1	0	0	0	1	1	1	1	0	0	1	1	1	0	1	1	1	0	0	0	0	0	0	0	0
186	2019	2018.09-2019.04	Winter	2	33	1	1	0	0	0	1	0	0	2	0	0	1	1	1	1	1	1	1	0	0	1	0	0	0	0	0
187	2019	2018.09-2019.04	Winter	2	2	2	1	0	0	9	1	1	1	1	1	1	1	1	1	1	1	1	1	0	0	0	0	0	1	0	0
188	2019	2018.09-2019.04																						0	0	0	0	0	0	0	0
189	2019	2018.09-2019.04		1	71	1	0	1	0	1	1	1	1	1	1	1	1	1	1	1	1	1	1	0	0	0	0	0	0	0	0
190	2019	2018.09-2019.04		2	65	1	0	1	0	1	1	1	1	1	1	1	1	1	1	1	1	1	1	0	0	0	0	0	0	0	0
191	2019	2018.09-2019.04		1	71	1	0	1	0	1	1	1	1	1	0	0	1	1	1	1	1	1	1	0	0	0	0	0	0	0	0
192	2019	2018.09-2019.04		1	81	1	0	1	0	1	1	1	1	1	0	0	1	1	1	1	1	1	1	0	0	0	0	0	0	0	0
193	2019	2018.09-2019.04	Spring	1	71	1	1	1	0	1	1	1	1	1	1	1	1	1	1	1	1	1	1	0	0	0	0	0	0	0	0
194	2019	2018.09-2019.04	Spring	1	81	1	0	0	0	0	1	0	2	1	0	0	1	1	1	1	1	1	1	0	0	1	0	0	0	0	0
195	2019	2018.09-2019.04	Spring	1	38	2	0	1	0	1	1	1	1	1	0	0	1	1	1	1	1	1	1	0	0	0	0	0	0	0	0
196	2019	2018.09-2019.04	Spring	2	85	1	0	1	0	1	0	0	2	1	0	0	1	1	1	0	1	1	1	0	0	0	0	0	0	0	0
197	2019	2018.09-2019.04	Spring	2	76	2	0	1	1	1	1	1	1	1	1	1	1	1	1	1	1	1	1	0	0	0	0	0	0	0	0
198	2019	2018.09-2019.04	Spring	1	71	1	0	1	0	1	1	1	1	1	1	1	1	1	1	1	1	1	1	0	0	0	0	0	0	0	0
199	2019	2018.09-2019.04	Spring	2	0.3	2	0	1	1	1	1	1	1	1	1	1	1	1	1	1	1	1	1	0	0	0	0	0	0	0	0
200	2019	2018.09-2019.04	Spring	1	86	1	0	1	0	1	0	0	2	1	0	0	1	1	1	1	1	1	1	0	0	0	0	0	0	0	0
201	2019	2018.09-2019.04	Spring	2	70	1	0	1	0	1	1	1	1	1	0	0	1	1	1	1	1	1	1	0	0	0	0	0	0	0	0
202	2019	2018.09-2019.04	Spring	2	67	1	0	1	0	1	0	1	1	1	0	0	1	1	1	1	1	1	1	0	0	0	0	0	0	0	0
203	2019	2018.09-2019.04	Spring	2	51	2	1	0	0	0	1	1	1	1	0	0	1	1	1	1	1	1	1	0	0	0	0	0	0	0	0
204	2019	2018.09-2019.04	Spring	1	0.02	1	0	1	0	1	1	1	1	1	1	1	1	1	1	1	1	1	1	0	0	0	0	0	0	0	0
205	2019	2018.09-2019.04	Spring					SA																0	0	0	0	0	0	0	0
206	2019	2018.09-2019.04	Spring					SA																0	0	0	0	0	0	0	0
207	2019	2018.09-2019.04	Spring	1	87	1	1	0	0	0	2	0	0	0	0	0	1	1	1	1	1	1	1	0	0	0	0	0	0	0	0
208	2019	2018.09-2019.04	Spring	1	84	2	1	0	0	0	1	0	0	2	0	0	1	1	1	0	1	1	1	0	0	1	0	0	0	0	0
209	2019	2018.09-2019.04	Spring	2	23	1	0	1	0	1	1	1	1	1	1	1	1	1	1	1	1	1	1	0	0	0	0	0	0	0	0
210	2019	2018.09-2019.04	Spring	2	57	1	0	1	0	1	1	1	1	1	1	1	1	1	1	1	1	1	1	0	0	0	0	0	0	0	0
211	2019	2018.09-2019.04	Spring	1	65	1	1	0	0	0	0	0	0	2	0	0	1	3	0	1	3	1	0	0	0	0	0	0	0	0	1
212	2019	2018.09-2019.04	Spring	1	83	2	0	1	0	1	1	1	1	1	1	1	1	1	1	1	1	1	1	0	0	0	0	0	0	0	0
213	2019	2018.09-2019.04	Spring	1	19	1	1	0	0	0	1	1	1	1	1	1	1	1	1	1	1	1	1	0	0	0	0	0	0	0	0
214	2019	2018.09-2019.04	Spring	1	72	1	0	1	1	1	1	1	1	1	1	1	1	1	1	1	1	1	1	0	0	0	0	0	0	0	0
215	2019	2018.09-2019.04	Spring	1	71	1	0	1	0	1	1	1	1	1	1	1	1	1	1	1	1	1	1	0	0	0	0	0	0	0	0
216	2019	2018.09-2019.04	Spring	1	86	2	0	1	0	1	1	1	1	1	1	1	1	1	1	0	1	1	1	0	0	0	0	0	0	0	0
217	2019	2018.09-2019.04	Spring	2	32	2	0	1	1	1	1	1	1	1	0	0	1	1	1	1	1	1	1	0	0	0	0	0	0	0	0
218	2019	2018.09-2019.04	Spring	2	85	1	1	0	0	0	1	1	1	1	1	1	1	1	1	1	1	1	1	0	0	0	0	0	0	0	0
219	2019	2018.09-2019.04	Spring	1	5	2	0	1	0	1	1	1	1	1	0	0	1	1	1	1	1	1	1	0	0	0	0	0	0	0	0
220	2019	2018.09-2019.04	Spring	2	85	1	0	1	0	1	1	1	1	1	1	1	1	1	0	1	1	1	1	0	0	0	0	0	0	0	0
221	2019	2018.09-2019.04	Spring	2	29	1	0	1	0	1	1	1	1	1	1	1	1	1	1	1	1	1	1	0	0	0	0	0	0	0	0
222	2019	2018.09-2019.04	Spring	2	97	1	0	1	0	1	2	0	0	2	0	1	1	1	1	0	1	1	1	0	0	0	0	0	0	0	0
223	2019	2018.09-2019.04	Spring	2	59	1	0	1	1	1	1	1	1	1	1	1	1	1	1	1	1	1	1	0	0	0	0	0	0	0	0
224	2019	2018.09-2019.04	Spring	2	14	1	0	1	0	1	1	1	1	1	1	1	1	1	0	1	1	1	1	0	0	0	0	0	0	0	0
225	2019	2018.09-2019.04	Spring	2	55	1	0	1	0	1	1	1	1	1	1	1	1	1	1	1	1	1	1	0	0	0	0	0	0	0	0
226	2019	2018.09-2019.04	Spring	1	75	1	0	1	0	1	1	1	1	1	0	0	1	1	1	1	1	1	1	0	0	0	0	0	0	0	0
227	2019	2018.09-2019.04	Spring	1	0.25	2	0	1	0	1	1	1	1	1	1	1	1	1	1	1	1	1	1	0	0	0	0	0	0	0	0
228	2019	2018.09-2019.04	Spring	1	71	1	1	0	0	0	1	1	1	1	1	2	1	1	1	1	1	1	1	0	0	0	0	0	0	0	0
229	2019	2018.09-2019.04	Spring	1	83	1	1	0	0	0	1	0	0	0	0	0	1	1	0	1	1	1	1	0	0	0	0	0	0	0	0
230	2019	2018.09-2019.04	Spring	2	69	1	0	1	1	1	1	1	1	1	1	1	1	1	1	1	1	1	1	0	0	0	0	0	0	0	0
231	2019	2018.09-2019.04	Spring	1	94	1	0	1	0	1	1	1	1	1	1	1	1	1	1	0	1	1	1	0	0	0	0	0	0	0	0
232	2019	2018.09-2019.04	Spring	1	0.17	2	0	1	1	1	1	1	1	1	1	1	1	1	1	1	1	1	1	0	0	0	0	0	0	0	0
233	2019	2018.09-2019.04	Spring	1	22	1	1	0	0	0	1	1	1	1	0	0	1	1	1	0	1	1	1	0	0	0	0	0	0	0	0
234	2019	2018.09-2019.04	Spring	1	2	2	0	1	0	1	1	1	1	1	0	0	1	1	1	0	1	1	1	0	0	0	0	0	0	0	0
235	2019	2018.09-2019.04	Spring	1	0.25	2	0	1	1	1	1	1	1	1	1	1	1	1	1	1	1	1	1	0	0	0	0	0	0	0	0
236	2019	2018.09-2019.04	Spring	1	23		0	1	0	1	1	1	1	1	0	0	1	1	1	0	1	1	1	0	0	0	0	0	0	0	0
237	2019	2018.09-2019.04	Spring	1	72	1	0	1	0	1	1	1	1	1	1	1	1	1	1	0	1	1	1	0	0	0	0	0	0	0	0
238	2019	2018.09-2019.04	Spring	1	87	1	1	0	0	0	1	0	0	0	0	0	1	1	1	1	1	1	1	0	1	0	0	0	0	0	0
239	2019	2018.09-2019.04	Spring	2	0.25	2	0	1	1	1	1	1	1	1	1	1	1	1	1	1	1	1	1	0	0	0	0	0	0	0	0
240	2019	2018.09-2019.04	Spring	1	65	2	0	1	0	1	1	1	1	1	1	1	1	1	1	1	1	1	1	0	0	0	0	0	0	0	0
241	2019	2018.09-2019.04	Spring	1	70	1	0	1	0	1	1	1	1	1	1	1	1	1	1	1	1	1	1	0	0	0	0	0	0	0	0
242	2019	2018.09-2019.04	Spring	2	6	2	0	1	0	1	1	1	1	1	0	0	1	1	1	1	1	1	1	0	0	0	0	0	0	0	0
243	2019	2018.09-2019.04	Spring	2	1	1	0	1	0	1	1	1	1	1	1	1	1	1	1	1	1	1	1	0	0	0	0	0	0	0	0
244	2019	2018.09-2019.04	Spring	1	72	1	0	1	0	1	1	1	1	1	1	1	1	1	1	0	1	1	1	0	0	0	0	0	0	0	0
245	2019	2018.09-2019.04	Spring	1	82	1	1	0	0	0	1	0	0	0	0	0	1	1	1	1	1	1	1	0	0	0	0	0	0	0	0
246	2019	2018.09-2019.04	Spring	1	69	1	0	1	0	1	1	1	1	1	1	1	1	1	1	1	1	1	1	0	0	0	0	0	0	0	0
247	2019	2018.09-2019.04	Spring	1	0.42	2	0	1	0	1	1	1	1	1	1	1	1	1	1	1	1	1	1	0	0	0	0	0	0	0	0
248	2019	2018.09-2019.04	Spring	1	68	1	0	1	0	1	1	1	1	1	1	1	1	1	1	1	1	1	1	0	0	0	0	0	0	0	0
249	2019	2018.09-2019.04	Spring	1	64	2	0	0	1	1	1	1	1	1	1	1	1	1	1	1	1	1	1	0	0	0	0	0	0	0	0
250	2019	2018.09-2019.04	Spring	1	90	1	1	0	0	0	1	1	1	1	1	1	1	1	1	1	1	1	1	0	0	0	0	0	1	0	0
251	2019	2018.09-2019.04	Spring	2	1	1	0	1	0	1	1	1	1	1	1	1	1	1	1	1	1	1	1	0	0	0	0	0	0	0	0
252	2019	2018.09-2019.04	Spring	1	72	1	0	1	0	1	1	1	1	1	1	1	1	1	1	0	1	1	1	0	0	0	0	0	0	0	0
253	2019	2018.09-2019.04	Spring	1	0.25	2	0	1	0	1	1	1	1	1	1	1	1	1	1	1	1	1	1	0	0	0	0	0	0	0	0
254	2019	2018.09-2019.04	Spring	1	0.3	2	1	0	0	0	1	1	1	1	1	1	1	1	1	1	1	1	1	0	0	0	0	0	0	0	0
255	2019	2018.09-2019.04	Spring	1	72	1	0	1	0	1	1	1	1	1	1	1	1	1	1	0	1	1	1	0	0	0	0	0	0	0	0
256	2019	2018.09-2019.04	Spring	1	88	1	0	1	0	1	1	0	0	2	0	0	1	1	1	1	1	1	1	0	0	0	0	0	0	0	0
257	2019	2018.09-2019.04	Spring	2	76	1	0	1	0	1	0	1	1	1	0	0	1	1	1	1	1	1	1	0	0	0	0	0	0	0	0
258	2019	2018.09-2019.04	Spring	2	31	1	0	1	0	1	1	1	1	1	0	0	1	1	1	1	1	1	1	0	0	0	0	0	0	0	0
259	2019	2018.09-2019.04	Spring	2	63	1	0	1	0	1	1	1	1	1	1	1	1	1	1	1	1	1	1	0	0	0	0	0	0	0	0
260	2019	2018.09-2019.04	Spring	1	93	1	0	1	0	1	1	0	2	1	1	1	1	1	1	1	1	1	1	0	0	0	0	0	0	0	1
261	2019	2018.09-2019.04	Spring	1	85	1	1	0	0	0	0	0	0	2	0	0	1	1	1	1	1	1	1	0	0	0	0	0	0	0	0
262	2019	2018.09-2019.04	Spring	2	40	2	1	0	0	0	1	1	1	1	0	0	1	1	1	0	1	1	1	0	0	0	1	0	0	0	0
263	2019	2018.09-2019.04	Spring	2	52	1	0	1	0	1	1	1	1	1	0	0	1	1	1	1	1	1	1	0	0	0	0	0	0	0	0
264	2019	2018.09-2019.04	Spring	1	83	1	1	0	9	0	1	0	0	0	0	0	1	1	1	1	1	1	1	0	1	0	0	0	0	0	0
265	2019	2018.09-2019.04	Spring	1	83	1	1	0	0	0	1	0	0	0	0	0	1	1	1	1	1	1	1	0	1	0	0	0	0	0	0
266	2019	2018.09-2019.04	Spring	1	93	1	0	1	0	1	1	0	2	1	1	1	1	1	1	1	1	1	1	0	0	0	0	0	0	0	1
267	2019	2018.09-2019.04	Spring	2	89	1	1	0	0	0	2	0	2	1	1	1	1	1	1	1	1	1	1	0	0	0	0	0	0	0	0
268	2019	2018.09-2019.04	Spring	1	78	2	1	0	0	0	1	0	0	0	0	0	1	1	1	1	1	1	1	0	0	0	0	0	0	0	0
269	2019	2018.09-2019.04		2	80	1	0	0	0	0	1	0	0	0	0	0	1	1	1	1	1	1	1	0	0	0	0	0	0	0	0
270	2019	2018.09-2019.04					0	1	0	1	1	1	1	1	1	1	1	1	1	0	1	1	1	0	0	0	0	0	0	0	0
271	2019	2018.09-2019.04					0	1	1	1	1	1	1	1	1	1	1	1	1	1	1	1	2	0	0	0	0	0	0	0	0
272	2019	2018.09-2019.04		2	97	1	0	1	0	1	1	0	2	1	0	0	1	1	1	0	1	1	1	0	0	0	0	0	0	0	0
273	2019	2019.09-2020.04	Winter	2	58	2	0	1	1	1	1	1	1	1	0	0	1	1	1	1	1	1	1	0	0	0	0	0	0	0	0
274	2019	2019.09-2020.04	Winter	1	60	1	1	0	0	0	1	1	1	1	0	0	1	1	1	0	1	1	1	0	0	1	0	0	0	0	0
275	2019	2019.09-2020.04	Winter	1	89	1	0	1	0	1	1	0	0	2	0	0	1	1	1	1	1	1	1	0	0	0	0	0	0	0	0
276	2019	2019.09-2020.04	Winter	1	26	1	0	1	0	1	1	1	1	1	1	1	1	1	1	1	1	1	1	0	0	0	0	0	0	0	0
277	2019	2019.09-2020.04	Winter	2	13	2	0	1	0	1	1	1	1	1	1	1	1	1	1	1	1	1	1	0	0	0	0	0	0	0	0
278	2019	2019.09-2020.04	Winter	1	61	1	0	1	0	1	1	1	1	1	1	1	1	1	1	0	1	1	1	0	0	0	0	0	0	0	0
279	2019	2019.09-2020.04	Winter	1	74	2	1	0	0	0	1	0	2	1	0	0	1	1	1	1	1	1	1	0	0	0	0	0	0	0	0
280	2019	2019.09-2020.04	Winter	2	67		1	0	0	0	1	0	0	2	1	1	1	1	1	1	1	1	1	0	0	0	0	0	0	0	1
281	2019	2019.09-2020.04	Winter	2	85		0	1	1	1	1	1	1	1	2	1	1	1	1	1	1	1	1	0	0	0	0	0	0	0	0
282	2019	2019.09-2020.04	Winter	1	88		1	0	0	0	0	0	0	2	0	0	1	1	1	1	1	1	1	0	0	0	0	0	0	0	1
283	2019	2019.09-2020.04	Winter	2	37		1	0	0	0	1	1	1	1	1	1	1	1	1	1	1	1	1	0	0	0	0	0	0	0	0
284	2019	2019.09-2020.04	Winter	1	63		0	1	0	1	1	1	1	1	1	1	1	1	1	1	1	1	1	0	0	0	0	0	0	0	0
285	2019	2019.09-2020.04	Winter	2	1		1	0	0	0	1	1	1	1	0	0	1	1	1	0	1	1	1	0	0	0	0	0	0	0	0
286	2019	2019.09-2020.04	Winter	2	47		0	1	0	1	1	1	1	1	0	0	1	1	1	0	1	1	2	0	0	0	0	0	0	0	0
287	2019	2019.09-2020.04	Winter	1	95		1	0	0	0	0	0	0	2	0	0	1	1	1	0	1	1	1	0	0	0	0	0	0	0	1
288	2019	2019.09-2020.04	Winter	1	89		0	1	0	1	2	0	0	2	0	0	1	1	1	1	1	1	1	0	0	0	0	0	0	0	0
289	2019	2019.09-2020.04	Winter	2	34		1	0	0	0	1	1	1	1	1	1	1	1	1	1	1	2	1	0	0	0	0	0	0	0	0
290	2019	2019.09-2020.04	Winter	2	79		0	1	0	1	1	1	1	1	1	1	1	1	1	0	1	1	1	0	0	0	0	0	0	0	0
291	2019	2019.09-2020.04	Winter	2	88		0	1	0	1	1	1	1	1	1	1	1	1	1	1	1	1	1	0	0	0	0	0	0	0	0
292	2019	2019.09-2020.04	Winter	1	57		0	1	1	1	1	1	1	1	1	1	1	1	1	1	1	1	1	0	0	0	0	0	0	0	0
293	2019	2019.09-2020.04	Winter	2	7		1	0	0	0	1	1	1	1	1	1	1	1	1	0	1	1	1	0	0	0	0	0	0	0	0
294	2019	2019.09-2020.04	Winter	1	87		1	0	0	0	1	0	0	0	0	0	1	1	1	1	1	1	1	0	1	0	0	0	0	0	0
295	2019	2019.09-2020.04	Winter	1	5		0	1	0	1	1	1	1	1	0	0	1	1	1	1	1	1	1	0	0	0	0	0	0	0	0
296	2019	2019.09-2020.04	Winter	1	84		0	1	0	1	1	1	1	1	0	1	1	1	1	0	1	1	1	0	0	0	0	0	0	0	0
297	2019	2019.09-2020.04	Winter	2	67		1	0	0	0			0	2	1	1	1	1	1	1	1	1	1	0	0	0	0	0	0	0	0
298	2019	2019.09-2020.04	Winter	2	31		0	1	0	1	1	1	1	1	1	1	1	1	1	1	1	1	1	0	0	0	0	0	0	0	0
299	2019	2019.09-2020.04	Winter	1	79		1	0	0	1	0	0	0	0	0	1	1	1	1	1	1	1	1	0	1	0	0	0	1	0	0
300	2019	2019.09-2020.04	Winter	2	53		1	0	0	0	1	0	0	0	0	0	1	1	1	1	1	1	1	0	0	0	0	0	0	0	0
301	2019	2019.09-2020.04	Winter	1	42		0	1	0	1	1	1	1	1	1	1	1	1	1	1	1	1	1	0	0	0	0	0	0	0	0
302	2019	2019.09-2020.04	Winter	2	53		1	0	0	0	1	0	0	0	0	0	1	1	1	1	1	1	1	0	1	0	0	0	1	0	0
303	2019	2019.09-2020.04	Winter	1	32		0	1	0	1	1	1	1	1	0	0	1	1	1	1	1	1	1	0	0	0	0	0	0	0	0
304	2020	2019.09-2020.04	Winter	1	2		0	1	0	1	1	1	1	1	0	0	1	1	1	1	1	1	1	0	0	0	0	0	0	0	0
305	2020	2019.09-2020.04	Winter	1	63		0	1	0	1	1	1	1	1	1	1	1	1	1	1	1	1	1	0	0	0	0	0	0	0	0
306	2020	2019.09-2020.04	Winter	1	95		1	0	0	0	1	1	1	1	0	0	1	1	1	0	1	1	1	0	0	1	0	0	0	0	0
307	2020	2019.09-2020.04	Winter	2	53		1	0	0	0	1	0	0	0	0	0	1	1	1	1	1	1	1	0	1	0	0	0	0	0	0
308	2020	2019.09-2020.04	Winter	1	66		1	0	0	0	0	0	0	2	0	0	1	1	1	1	1	1	1	0	0	1	0	0	0	0	0
309	2020	2019.09-2020.04	Winter	2	16		0	1	0	1	1	1	1	1	1	1	1	1	1	1	1	1	1	0	0	0	0	0	0	0	0
310	2020	2019.09-2020.04	Winter	2	93		1	0	0	0	1	1	1	1	1	1	1	1	1	1	1	2	1	1	0	0	1	0	0	1	0
311	2020	2019.09-2020.04	Winter	2	20		1	0	0	0	0	0	0	0	0	0	1	1	1	1	1	1	1	0	0	0	0	0	0	0	0
312	2020	2019.09-2020.04	Winter	2	79		0	1	0	1	1	1	1	1	1	1	1	1	1	0	1	1	1	0	0	0	0	0	0	0	0
313	2020	2019.09-2020.04	Winter	1	66		1	0	0	0	0	0	0	2	0	0	1	1	1	1	1	1	1	0	0	0	0	0	0	0	1
314	2020	2019.09-2020.04	Winter	1	67		0	1	0	1	1	1	1	1	1	1	1	1	1	0	1	1	1	0	0	0	0	0	0	0	0
315	2020	2019.09-2020.04	Winter	1	0.25		0	1	1	1	1	1	1	1	1	1	1	1	1	1	1	1	1	0	0	0	0	0	0	0	0
316	2020	2019.09-2020.04	Winter	1	0.25		0	1	0	1	1	1	1	1	1	1	1	1	1	1	1	1	1	0	0	0	0	0	0	0	0
317	2020	2019.09-2020.04	Winter	1	0.75		0	1	0	1	1	1	1	1	1	1	1	1	1	1	1	1	1	0	0	0	0	0	0	0	0
318	2020	2019.09-2020.04	Winter	1	36		1	0	0	0	1	1	1	1	1	1	1	1	1	1	1	2	1	0	0	0	0	0	0	0	0
319	2020	2019.09-2020.04	Winter	1	23		1	0	0	0	2	0	0	2	0	0	1	1	1	1	1	1	1	0	0	0	0	0	0	0	1
320	2020	2019.09-2020.04	Winter	1	36		1	0	0	0	1	1	1	1	1	1	1	1	1	1	1	2	1	0	0	0	0	0	0	0	0
321	2021	2020.09-2021.04					0	1	0	1	1	1	1	1	1	1	1	1	1	1	1	1	1	0	0	0	0	0	0	0	0
322	2021	2020.09-2021.04					0	1	1	1	1	1	1	1	1	1	1	1	1	1	1	1	1	0	0	0	0	0	0	0	0
323	2021	2020.09-2021.04					0	1	0	1	1	1	1	1	1	1	1	1	1	0	1	1	1	0	0	0	0	0	0	0	0
324	2021	2020.09-2021.04					0	1	0	1	1	1	1	1	1	1	1	1	1	1	1	1	1	0	0	0	0	0	0	0	0
325	2021	2020.09-2021.04	Winter	1	94	1	1	0	0	0	2	0	0	0	0	0	1	1	1	1	1	1	1	0	0	1	0	0	0	0	0
326	2021	2020.09-2021.04	Winter				0	1	1	1	1	1	1	1	1	1	1	1	1	1	1	1	1	0	0	0	0	0	0	0	0
327	2021	2020.09-2021.04	Winter				0	1	1	1	1	1	1	1	1	1	1	1	1	1	1	1	1	0	0	0	0	0	0	0	0
328	2021	2020.09-2021.04	Winter	1	26	2	1	0	0	0	1	1	1	1	0	0	1	1	1	0	1	1	1	0	0	0	0	0	0	0	0
329	2021	2020.09-2021.04	Winter	1	25	1	1	0	0	0	1	1	1	1	1	1	1	1	1	1	1	1	1	0	0	0	0	0	0	0	0
330	2021	2020.09-2021.04	Winter	2	64	1	1	0	0	0	2	0	0	0	0	0	1	1	1	1	1	1	1	0	1	0	0	0	0	0	0
331	2021	2020.09-2021.04	Winter				0	1	0	1	1	1	1	1	1	1	1	1	1	1	1	1	1	0	0	0	0	0	0	0	0
332	2021	2020.09-2021.04	Winter				0	1	1	1	1	1	1	1	1	1	1	1	1	1	1	1	1	0	0	0	0	0	0	0	0
333	2021	2020.09-2021.04	Winter				0	1	0	1	1	1	1	1	0	0	1	1	1	0	1	1	1	0	0	0	0	0	0	0	0
334	2021	2020.09-2021.04	Winter				0	1	0	1	1	1	1	1	1	1	1	1	1	1	1	1	1	0	0	0	0	0	0	0	0
335	2021	2020.09-2021.04	Winter				0	1	0	1	1	1	1	1	1	1	1	1	1	1	1	1	1	0	0	0	0	0	0	0	0
336	2021	2020.09-2021.04	Winter	1	33	2	1	0	0	0	1	1	1	1	0	0	1	1	1	0	1	1	1	0	0	1	0	0	0	0	0
337	2021	2020.09-2021.04	Winter				0	1	0	1	1	1	1	1	1	1	1	1	1	1	1	1	1	0	0	0	0	0	0	0	0
338	2021	2020.09-2021.04	Winter				0	1	0	1	1	1	1	1	1	1	1	1	1	1	1	1	1	0	0	0	0	0	0	0	0
339	2021	2020.09-2021.04	Winter				0	1	0	1	1	1	1	1	1	1	1	1	1	1	1	1	1	0	0	0	0	0	0	0	0
340	2021	2020.09-2021.04	Winter				0	1	0	1	2	1	1	1	0	0	1	1	1	1	1	1	1	0	0	0	0	0	0	0	0
341	2021	2020.09-2021.04	Winter	2	67	2	1	0	0	0	1	0	0	2	1	1	1	1	1	1	1	1	1	0	0	0	0	0	0	0	0
342	2021	2020.09-2021.04	Winter				0	1	1	1	1	1	1	1	1	1	1	1	1	1	1	1	1	0	0	0	0	0	0	0	0
343	2021	2020.09-2021.04	Winter	1	71	1	1	0	0	0	0	0	0	0	0	0	1	1	1	0	1	1	1	0	0	0	0	0	0	0	0
344	2021	2020.09-2021.04	Winter				0	1	0	1	1	1	1	1	1	1	1	1	1	1	1	1	1	0	0	0	0	0	0	0	0
345	2021	2020.09-2021.04	Winter				0	1	0	1	1	1	1	1	1	1	1	1	1	1	1	1	1	0	0	0	0	0	0	0	0
346	2021	2020.09-2021.04	Winter				0	1	0	1	1	1	1	1	0	0	1	1	1	1	1	1	1	0	0	0	0	0	0	0	0
347	2021	2020.09-2021.04	Spring	1	36	2	1	0	0	0	1	1	1	1	0	0	1	1	1	0	1	1	1	0	0	0	0	0	0	0	0
348	2021	2020.09-2021.04	Winter	1	90	1	1	0	0	0	1	0	0	0	0	0	1	1	1	1	1	1	1	0	0	0	0	0	0	0	0
349	2021	2020.09-2021.04					0	1	0	1	1	1	1	1	0	0	1	1	1	0	1	1	1	0	0	0	0	0	0	0	0
350	2021	2020.09-2021.04	Spring	2	28	1	1	0	0	0	1	1	1	1	1	1	1	1	1	1	1	1	1	0	0	0	0	0	0	0	0
351	2021	2020.09-2021.04	Spring	2	97	1	1	0	0	0	0	0	0	0	0	0	1	1	1	1	1	1	1	0	0	0	0	0	0	0	0
352	2021	2020.09-2021.04	Spring				0	1	0	1	1	1	1	1	1	1	1	1	1	1	1	1	1	0	0	0	0	0	0	0	0
353	2021	2020.09-2021.04	Spring				0	1	0	1	1	1	1	1	0	0	1	1	1	1	1	1	1	0	0	0	0	0	0	0	0
354	2021	2020.09-2021.04	Spring	2	11	2	1	0	0	0	1	1	1	1	1	1	1	1	1	0	1	1	1	0	0	0	1	0	0	0	0
355	2021	2020.09-2021.04	Spring				0	1	0	1	0	1	1	1	0	0	1	1	1	0	1	1	1	0	0	0	0	0	0	0	0
356	2021	2020.09-2021.04	Spring				0	1	1	1	1	1	1	1	1	1	1	1	1	1	1	1	1	0	0	0	0	0	0	0	0
357	2021	2020.09-2021.04	Spring	1	46	1	1	0	0	0	1	0	0	2	1	1	1	1	1	1	1	1	1	0	0	0	1	0	0	0	0
358	2021	2020.09-2021.04	Spring				0	1	0	1	1	1	1	1	0	0	1	1	1	1	1	1	1	0	0	0	0	0	0	0	0
359	2021	2020.09-2021.04	Spring				0	1	0	1	1	1	1	1	1	1	1	1	1	1	1	1	1	0	0	0	0	0	0	0	0
360	2021	2020.09-2021.04	Spring				0	1	0	1	1	1	1	1	1	1	1	1	1	1	1	1	1	0	0	0	0	0	0	0	0
361	2021	2020.09-2021.04	Spring	1	53	1	1	0	1	1	0	1	0	0	1	1	1	1	1	1	1	1	1	0	0	1	0	0	0	0	0
362	2021	2020.09-2021.04	Spring				0	1	0	1	1	1	1	1	1	1	1	1	1	1	1	1	1	0	0	0	0	0	0	0	0
363	2021	2020.09-2021.04	Spring	2	82	1	1	0	0	0	0	0	0	0	0	0	1	1	1	1	1	1	1	0	0	0	0	0	0	0	0
364	2021	2020.09-2021.04	Spring				0	1	0	1	1	1	1	1	1	1	1	1	1	1	1	1	1	0	0	0	0	0	0	0	0
365	2021	2020.09-2021.04	Spring				0	1	0	1	1	1	1	1	1	1	1	1	1	1	1	1	1	0	0	0	0	0	0	0	0
366	2021	2020.09-2021.04	Spring				0	1	0	1	1	1	1	1	1	1	1	1	1	1	1	1	1	0	0	0	0	0	0	0	0
367	2021	2020.09-2021.04	Spring				0	1	0	1	1	1	1	1	1	1	1	1	1	1	1	1	1	0	0	0	0	0	0	0	0
368	2021	2020.09-2021.04	Spring				0	1	1	1	1	1	1	1	1	1	1	1	1	1	1	1	1	0	0	0	0	0	0	0	0
369	2021	2020.09-2021.04	Spring				0	1	0	1	1	1	1	1	0	1	1	1	1	1	1	1	1	0	0	0	0	0	0	0	0
370	2021	2020.09-2021.04	Spring				0	1	0	1	1	1	1	1	1	1	1	1	1	1	1	1	1	0	0	0	0	0	0	0	0
371	2021	2020.09-2021.04	Spring				0	1	0	1	1	1	1	1	0	0	1	1	1	1	1	1	1	0	0	0	0	0	0	0	0
372	2021	2020.09-2021.04	Spring				0	1	1	1	1	1	1	1	1	1	1	1	1	1	1	1	1	0	0	0	0	0	0	0	0
373	2021	2020.09-2021.04	Spring	2	93	1	1	0	0	0	1	0	0	0	0	0	1	1	1	1	1	1	1	0	0	0	0	0	0	0	0
374	2021	2020.09-2021.04	Spring				0	1	0	1	1	1	1	1	1	1	1	1	1	1	1	1	1	0	0	0	0	0	0	0	0
375	2021	2020.09-2021.04	Spring	2	8	1	1	0	0	0	1	1	1	1	0	0	1	1	1	1	1	1	1	0	1	0	0	0	0	0	0
376	2021	2020.09-2021.04	Spring				0	1	0	1	1	1	1	1	1	1	1	1	1	1	1	2	1	0	0	0	0	0	0	0	0
377	2021	2020.09-2021.04	Spring				0	1	0	1	1	1	1	1	0	0	1	1	1	1	1	1	1	0	0	0	0	0	0	0	0
378	2021	2020.09-2021.04	Spring	1	33	2	1	0	0	0	1	1	1	1	1	1	1	1	1	1	1	2	1	0	0	0	0	0	0	0	1
379	2021	2020.09-2021.04	Spring				0	1	0	1	1	1	1	1	1	1	1	1	1	1	1	1	1	0	0	0	0	0	0	0	0
380	2021	2020.09-2021.04	Spring				0	1	1	1	1	1	1	1	1	1	1	1	1	1	1	1	1	0	0	0	0	0	0	0	0
381	2021	2021.09-2022.04	Winter	1	66	1	1	0	0	0	0	0	0	0	0	0	1	1	1	0	1	1	1	0	1	0	0	0	0	0	0
382	2021	2021.09-2022.04	Winter	2	0.41	2	1	0	0	0	1	1	1	1	0	0	1	1	1	1	1	1	1	0	1	0	0	0	0	0	0
383	2021	2021.09-2022.04	Winter	1	0.33	1	1	0	0	0	1	1	1	1	0	0	1	1	1	1	1	1	1	0	0	0	0	0	0	0	0
384	2021	2021.09-2022.04	Winter	2	5	2	0	1	0	1	0	0	0	2	1	1	1	1	1	1	1	1	1	0	0	0	0	0	0	0	0
385	2021	2021.09-2022.04	Winter	2	73	2	1	0	0	0	0	0	0	0	1	1	1	1	1	1	1	1	1	0	1	0	0	0	0	0	0
386	2021	2021.09-2022.04	Winter	1	37	1	0	1	0	1	1	1	1	1	1	1	1	1	1	1	1	1	1	0	0	0	0	0	0	0	0
387	2021	2021.09-2022.04	Winter	1	72	1	0	1	0	1	1	1	1	1	0	0	1	1	1	1	1	1	1	0	0	0	0	0	0	0	0
388	2021	2021.09-2022.04	Winter	1	17	1	1	0	0	0	1	1	1	1	0	0	1	1	1	0	1	1	1	0	0	0	0	0	0	0	0
389	2021	2021.09-2022.04	Winter	2	86	1	1	0	0	0	1	1	1	1	1	1	1	1	1	1	1	1	1	0	0	0	0	0	0	0	0
390	2021	2021.09-2022.04	Winter	2	0.08	1	1	0	0	0	1	1	1	1	1	1	1	1	1	1	1	1	1	0	0	0	0	0	0	0	0
391	2021	2021.09-2022.04	Winter	2	83	1	0	1	0	1	1	1	1	1	1	1	1	1	1	1	1	1	1	0	0	0	0	0	0	0	0
392	2021	2021.09-2022.04	Winter	1	11	2	0	1	1	1	1	1	1	1	0	0	1	1	1	1	1	1	1	0	0	0	0	0	0	0	0
393	2021	2021.09-2022.04	Winter	1	0.41	1	0	1	0	1	1	1	1	1	1	1	1	1	1	0	1	1	1	0	0	0	0	0	0	0	0
394	2021	2021.09-2022.04	Winter	2	0.33	2	1	0	0	0	1	1	1	1	0	0	1	1	1	0	1	1	1	0	0	0	0	0	1	0	0
395	2021	2021.09-2022.04	Winter	1	40	2	1	0	0	0	1	1	1	1	0	0	1	1	1	1	1	1	1	0	0	0	0	0	0	0	0
396	2021	2021.09-2022.04	Winter	1	93	1	1																	0	1	0	0	0	0	0	0
397	2021	2021.09-2022.04	Winter	2	86	1	1																	0	0	0	0	0	0	0	0
398	2021	2021.09-2022.04	Winter	2	73	2	1	0	0	0	0	0	0	0	1	1	1	1	1	1	1	1	1	0	0	0	0	0	0	0	1
399	2021	2021.09-2022.04	Winter	1	61	1	0	1	0	1	1	1	1	1	1	1	1	1	1	1	1	1	2	0	0	0	0	0	0	0	0
400	2021	2021.09-2022.04	Winter	1	76	1	0	1	0	1	1	1	1	1	1	1	1	1	1	1	1	1	1	0	0	0	0	0	0	0	0
401	2021	2021.09-2022.04	Winter	1	90	1	0	1	0	1	1	1	1	1	1	1	1	1	1	1	1	1	1	0	0	0	0	0	0	0	0
402	2021	2021.09-2022.04	Winter	1	0.33	2	0	1	0	1	0	1	1	1	0	0	1	1	1	1	1	1	1	0	0	0	0	0	0	0	0
403	2021	2021.09-2022.04	Winter	1	66	1	1	0	0	0	0	0	0	0	0	0	1	1	1	0	1	1	1	0	0	1	0	0	0	0	0
404	2021	2021.09-2022.04	Winter	2	34	1	0	1	0	1	1	1	1	1	1	1	1	1	1	1	1	1	1	0	0	0	0	0	0	0	0
405	2021	2021.09-2022.04	Winter	2	51	2	0	1	1	1	1	1	1	1	1	1	1	1	1	1	1	1	1	0	0	0	0	0	0	0	0
406	2021	2021.09-2022.04	Winter	2	87	1	0	1	1	1	1	1	1	1	1	1	1	1	1	1	1	1	1	0	0	0	0	0	0	0	0
407	2021	2021.09-2022.04	Winter	1	42	1	1	0	0	0	1	1	1	1	1	1	1	1	1	1	1	1	2	0	0	0	0	0	0	0	0
408	2021	2021.09-2022.04	Winter	1	4	2	0	1	0	1	0	1	1	1	0	0	1	1	1	1	1	1	1	0	0	0	0	0	0	0	0
409	2021	2021.09-2022.04	Winter	1	58	1	0	1	0	1	1	1	1	1	1	1	1	1	1	0	1	1	1	0	0	0	0	0	0	0	0
410	2021	2021.09-2022.04	Winter	1	75	1	0	1	1	1	1	1	1	1	1	1	1	1	1	1	1	1	1	0	0	0	0	0	0	0	0
411	2021	2021.09-2022.04	Winter	1	84	1	1	0	0	0	0	0	0	0	0	0	1	1	1	0	1	1	1	0	0	1	0	0	0	0	0
412	2021	2021.09-2022.04	Winter	1	81	1	1	0	0	0	1	0	0	0	0	0	1	1	1	1	1	1	1	0	0	0	0	0	0	0	0
413	2021	2021.09-2022.04	Winter	1	21	1	0	1	0	1	1	1	1	1	0	0	1	1	1	1	1	1	1	0	0	0	0	0	0	0	0
414	2021	2021.09-2022.04	Winter	1	66	1	1	0	0	0	0	0	0	0	0	0	1	1	1	0	1	1	1	0	0	1	0	0	0	0	0
415	2021	2021.09-2022.04	Winter	1	22	2	0	1	1	1	1	1	1	1	1	1	1	1	1	1	1	1	1	0	0	0	0	0	0	0	0
416	2021	2021.09-2022.04	Winter	1	0.33	2	1	0	0	0	1	1	1	1	1	1	1	1	1	1	1	1	1	0	0	0	0	0	0	0	0
417	2021	2021.09-2022.04	Winter	1	21	1	0	1	0	1	1	1	1	1	0	0	1	1	1	1	1	1	1	0	0	0	0	0	0	0	0
418	2021	2021.09-2022.04	Winter	2	63	1	0	1	0	1	1	1	1	1	1	1	1	1	1	1	1	1	1	0	0	0	0	0	0	0	0
419	2021	2021.09-2022.04	Winter	2	86	1	1	0	0	0	1	1	1	1	1	1	1	1	1	1	1	1	1	0	0	0	0	0	0	0	0
420	2021	2021.09-2022.04	Winter	1	72	1	0	1	0	1	1	1	1	1	0	0	1	1	1	1	1	1	1	0	0	0	0	0	0	0	0
421	2021	2021.09-2022.04	Winter	1	73	1	1	0	0	0	0	0	1	1	0	0	1	1	1	1	1	1	1	0	0	0	0	0	0	0	0
422	2021	2021.09-2022.04	Winter	2	58	1	0	1	0	1	1	1	1	1	0	0	1	1	1	1	1	1	1	0	0	0	0	0	0	0	0
423	2021	2021.09-2022.04	Winter	1	32	2	1	0	0	0	1	1	1	1	0	0	1	1	1	0	1	1	1	0	0	0	0	0	0	0	0
424	2021	2021.09-2022.04	Winter	2	101	1	0	0	0	0	2	1	1	1	0	0	1	1	1	1	1	1	1	0	0	0	0	0	0	0	0
425	2021	2021.09-2022.04	Winter	2	71	1	0	1	1	1	1	1	1	1	1	1	1	1	1	1	1	1	1	0	0	0	0	0	0	0	0
426	2021	2021.09-2022.04	Winter	1	85	1	1	0	0	0	1	1	1	1	1	1	1	1	1	1	1	1	1	0	0	0	0	0	0	0	0
427	2021	2021.09-2022.04	Winter	1	62	1	0	1	0	1	1	1	1	1	1	1	1	1	1	1	1	1	1	0	0	0	0	0	0	0	0
428	2021	2021.09-2022.04	Winter	1	85	1	0	1	0	1	0	0	0	0	0	0	1	1	1	1	1	1	1	0	0	0	0	0	0	0	0
429	2021	2021.09-2022.04	Winter	1	57	1	1	0	0	0	1	0	0	0	0	0	1	1	1	1	1	1	1	0	0	0	0	0	0	0	0
430	2021	2021.09-2022.04	Winter	2	95	1	0	0	0	0	1	0	0	0	0	0	1	1	1	0	1	1	1	0	0	1	1	1	0	0	0
431	2021	2021.09-2022.04	Winter	1	85	1	0	1	0	1	0	0	0	0	0	0	1	1	1	1	1	1	1	0	0	0	0	0	0	0	0
432	2021	2021.09-2022.04	Winter	1	57	2	1	0	0	0	1	0	0	0	0	0	1	1	1	1	1	1	1	0	1	0	0	0	0	0	0
433	2021	2021.09-2022.04	Winter	1	85	1	0	0	0	0	1	1	1	1	0	0	1	1	1	0	1	1	1	0	0	0	0	0	0	0	0
434	2021	2021.09-2022.04	Winter	1	44	1	0	1	1	1	1	1	1	1	1	1	1	1	1	1	1	1	1	0	0	0	0	0	0	0	0
435	2021	2021.09-2022.04	Winter	1	73	1	1	0	0	0	0	0	0	2	0	0	1	1	1	1	1	1	1	1	0	0	0	0	0	0	0
436	2021	2021.09-2022.04	Winter	2	92	1	1	0	0	0	2	0	0	0	0	0	1	1	1	1	1	1	1	0	0	0	1	0	0	0	1
437	2021	2021.09-2022.04	Winter	1	88	1	0	1	0	1	1	1	1	1	1	1	1	1	1	1	1	1	1	0	0	0	0	0	0	0	0
438	2021	2021.09-2022.04	Winter	2	18	2	0	1	0	1	1	1	1	1	0	0	1	1	1	1	1	1	1	0	0	0	0	0	0	0	0
439	2021	2021.09-2022.04	Winter	2	46	1	0	1	0	1	1	1	1	1	1	1	1	1	1	0	1	1	1	0	0	0	0	0	0	0	0
440	2021	2021.09-2022.04	Winter	2	95	1	1	0	0	0	1	0	0	0	0	0	1	1	1	0	1	1	1	0	0	0	1	0	0	0	1
441	2021	2021.09-2022.04	Winter	2	90	1	0	1	0	1	1	1	1	1	1	1	1	1	1	1	1	1	1	0	0	0	0	0	0	0	0
442	2021	2021.09-2022.04	Winter	2	27	2	1	0	0	0	1	1	1	1	0	0	1	1	1	1	1	1	1	0	0	0	0	0	0	0	0
443	2021	2021.09-2022.04	Winter	1	72	1	1	0	0	0	0	0	0	0	0	0	1	1	1	1	1	1	1	0	0	1	0	0	0	0	0
444	2021	2021.09-2022.04		2	89	1	0	1	0	1	1	1	1	1	1	1	1	1	1	1	1	1	1	0	0	0	0	0	0	0	0
445	2021	2021.09-2022.04		2	89	1	0	1	0	1	1	1	1	1	1	1	1	1	1	1	1	1	1	0	0	0	0	0	0	0	0
446	2021	2021.09-2022.04		2	62	1	0	1	0	1	1	1	1	1	1	1	1	1	1	1	1	1	1	0	0	0	0	0	0	0	0
447	2022	2021.09-2022.04	Spring	1	85	1	1																	0	0	1	0	0	0	0	0
448	2022	2021.09-2022.04	Spring	2	38	2	0																	0	0	0	0	0	0	0	0
449	2022	2021.09-2022.04	Spring	1	76	1	0	1	1	1	1	0	1	1	1	1	1	1	1	1	1	1	1	0	0	0	0	0	0	0	0
450	2022	2021.09-2022.04	Spring	1	38	2	0	1	0	1	1	1	1	1	1	1	1	1	1	0	1	1	1	0	0	0	0	0	0	0	0
451	2022	2021.09-2022.04	Spring	2	71	1	0	1	0	1	1	1	1	1	1	1	1	1	1	0	1	1	1	0	0	0	0	0	0	0	0
452	2022	2021.09-2022.04	Spring	1	89	1	0																	0	0	0	0	0	0	0	0
453	2022	2021.09-2022.04	Spring	2	86	1	1	0	0	0	1	1	1	1	0	0	1	1	1	1	1	1	1	0	0	0	0	0	0	0	0
454	2022	2021.09-2022.04	Spring	2	87	1	0	1	1	1	1	1	1	1	1	1	1	1	1	1	1	1	1	0	0	0	0	0	0	0	0
455	2022	2021.09-2022.04	Spring	1	0.41	2	0	1	1	1	1	1	1	1	1	1	1	1	1	1	1	1	1	0	0	0	0	0	0	0	0
456	2022	2021.09-2022.04	Spring	1	59	1	1	0	0	0	1	1	1	1	1	1	1	1	1	1	1	1	1	0	0	0	0	0	0	0	0
457	2022	2021.09-2022.04	Spring	1	45	2	0	1	0	1	1	1	1	1	1	1	1	1	1	0	1	1	1	0	0	0	0	0	0	0	0
458	2022	2021.09-2022.04	Spring	2	33	2	0	1	1	1	1	1	1	1	0	0	1	1	1	1	1	1	1	0	0	0	0	0	0	0	0
459	2022	2021.09-2022.04	Spring	1	59	1	1	0	0	0	1	1	1	1	1	1	1	1	1	1	1	1	1	0	0	0	0	0	0	0	0
460	2022	2021.09-2022.04	Spring	1	59	1	0	1	0	1	1	1	1	1	1	1	1	1	1	1	1	1	1	0	0	0	0	0	0	0	0
461	2022	2021.09-2022.04	Spring	1	83	1	0	1	0	1	1	1	1	1	0	0	1	1	1	1	1	1	1	0	0	0	0	0	0	0	0
462	2022	2021.09-2022.04	Spring	1	36	1	0	1	1	1	1	1	1	1	0	0	1	1	1	1	1	1	1	0	0	1	0	0	0	0	0
463	2022	2021.09-2022.04	Spring	1	82	1	1	0	0	0	1	0	0	0	0	0	1	1	1	0	1	1	1	0	0	1	0	0	0	0	0
464	2022	2021.09-2022.04	Spring	1	82	1	1	0	0	0	1	0	0	0	0	0	1	1	1	0	1	1	1	0	0	0	0	0	0	0	0
465	2022	2021.09-2022.04	Spring	2	38	1	0	1	0	1	1	1	1	1	1	1	1	1	1	1	1	1	1	0	0	0	0	0	0	0	0
466	2022	2021.09-2022.04	Spring	1	59	1	1	0	0	0	1	1	1	1	1	1	1	1	1	1	1	1	1	0	0	0	0	0	0	0	0
467	2022	2021.09-2022.04	Spring	2	82	1	0	1	0	1	2	0	0	0	0	0	1	1	1	0	1	1	1	0	0	0	0	0	0	0	0
468	2022	2021.09-2022.04	Spring	2	66	1	1	0	0	0	2	0	0	0	0	0	1	1	1	1	1	1	1	0	0	0	0	0	0	0	0
469	2022	2021.09-2022.04	Spring	2	42	2	0	1	0	1	1	1	1	1	0	0	1	1	1	0	1	1	1	0	0	0	0	0	0	0	0
470	2022	2021.09-2022.04	Spring	1	66	1	1	0	0	0	0	0	0	0	0	0	1	1	1	0	1	1	1	0	0	0	0	0	0	0	0
471	2022	2021.09-2022.04	Spring	1	82	1	1	0	0	0	1	0	0	0	0	0	1	1	1	0	1	1	1	0	0	0	0	0	0	0	0
472	2022	2021.09-2022.04	Spring	2	82	1	1	0	0	0	1	0	0	0	0	0	1	1	1	1	1	1	1	0	0	1	0	0	0	0	0
473	2022	2021.09-2022.04	Spring	1	32	1	0	1	0	1	1	1	1	1	1	1	1	1	1	1	1	1	1	0	0	0	0	0	0	0	0
474	2022	2021.09-2022.04	Spring	2	88	1	0	1	1	1	1	1	1	1	1	1	1	1	1	1	1	1	1	0	0	0	0	0	0	0	0
475	2022	2021.09-2022.04	Spring	2	88	2	1	0	0	0	0	0	0	0	0	0	1	1	1	1	1	1	1	0	0	1	0	0	0	0	0
476	2022	2021.09-2022.04	Spring	2	97	1	0	1	0	1	1	1	1	1	1	1	1	1	1	1	1	1	1	0	0	0	0	0	0	0	0
477	2022	2021.09-2022.04	Spring	2	3	1	0	1	0	1	1	1	1	1	0	0	1	1	1	1	1	1	1	0	0	0	0	0	0	0	0
478	2022	2021.09-2022.04	Spring	1	82	1	1	0	0	0	1	0	0	0	0	0	1	1	1	0	1	1	1	0	0	1	0	0	0	0	0
479	2022	2021.09-2022.04	Spring	2	82	1	0	1	1	1	1	1	1	1	1	1	1	1	1	1	1	1	1	0	0	0	0	0	0	0	0
480	2022	2021.09-2022.04	Spring	2	80	1	1	0	0	0	1	0	0	0	0	0	1	1	1	1	1	1	1	0	0	0	0	0	0	0	0
481	2022	2021.09-2022.04	Spring	1	65	2	1	0	0	0	1	0	0	0	0	0	1	1	1	1	1	1	1	0	0	0	0	0	0	0	0
482	2022	2021.09-2022.04	Spring	2	66	1	1	0	0	0	2	0	0	0	0	0	1	1	1	1	1	1	1	0	0	0	0	0	0	0	1
483	2022	2021.09-2022.04	Spring	2	70	1	1	0	0	0	1	0	0	0	0	0	1	1	1	0	1	1	1	0	0	0	0	0	0	0	0
484	2022	2021.09-2022.04	Spring	1	48	1	0	1	0	1	1	1	1	1	1	1	1	1	1	1	1	1	1	0	0	0	0	0	0	0	0
485	2022	2021.09-2022.04	Spring	2	62	2	0	1	1	1	1	1	1	1	1	1	1	1	1	1	1	1	1	0	0	0	0	0	0	0	0
486	2022	2021.09-2022.04	Spring	2	80	1	1	0	0	0	2	0	0	0	0	0	1	1	1	1	1	1	1	0	1	0	0	0	0	0	0
487	2022	2021.09-2022.04	Spring	2	80	1	1	0	0	0	1	0	0	0	0	0	1	1	1	1	1	1	1	0	0	0	1	0	0	0	0
488	2022	2021.09-2022.04	Spring	2	66	1	1	0	0	0	2	0	0	0	0	0	1	1	1	1	1	1	1	0	0	0	0	0	0	0	0
489	2022	2021.09-2022.04	Spring	2	78	1	1	0	0	0	1	1	1	1	0	0	1	1	1	0	1	1	1	0	0	0	1	0	0	0	0
490	2022	2021.09-2022.04	Spring	2	13	2	0	1	1	1	1	1	1	1	1	1	1	1	1	1	1	1	1	0	0	0	0	0	0	0	0
491	2022	2021.09-2022.04	Spring	1	59	1	0	1	0	1	1	1	1	1	1	1	1	1	1	1	1	1	1	0	0	0	0	0	0	0	0
492	2022	2021.09-2022.04	Spring	1	60	1	0	1	0	1	1	1	1	1	1	1	1	1	1	1	1	1	1	0	0	0	0	0	0	0	0
493	2022	2021.09-2022.04	Spring	1	59	1	0	1	0	1	1	1	1	1	1	1	1	1	1	1	1	1	1	0	0	0	0	0	0	0	0
494	2022	2021.09-2022.04	Spring	2	69	2	0	1	0	1	1	1	1	1	1	1	1	1	1	1	1	1	1	0	0	0	0	0	0	0	0
495	2022	2021.09-2022.04	Spring	1	3	1	0	1	0	1	1	1	1	1	1	1	1	1	1	1	1	1	1	0	0	0	0	0	0	0	0
496	2022	2021.09-2022.04	Spring	1	60	1	1	0	0	1	1	1	1	1	1	1	1	1	1	1	1	1	1	0	0	0	0	0	0	0	0
497	2022	2021.09-2022.04	Spring	1	59	1	0	1	0	1	1	1	1	1	1	1	1	1	1	1	1	1	1	0	0	0	0	0	0	0	0
498	2022	2021.09-2022.04	Spring	1	83	1	0	1	0	1	1	1	1	1	0	0	1	1	1	1	1	1	1	0	0	0	0	0	0	0	0
499	2022	2021.09-2022.04	Spring	1	82	1	1	0	0	0	1	0	0	0	0	0	1	1	1	0	1	1	1	0	0	0	0	0	0	0	0
500	2022	2021.09-2022.04	Spring	1	67	1	1	0	0	0	0	0	0	0	1	1	1	1	1	0	1	1	1	0	1	0	0	0	0	0	0
501	2022	2021.09-2022.04	Spring	1	82	1	1	0	0	0	1	0	0	0	0	0	1	1	1	0	1	1	1	0	1	0	0	0	0	0	0
502	2022	2021.09-2022.04	Spring	2	99	1	1	0	0	0	0	0	0	0	0	0	1	1	1	0	1	1	1	0	0	0	0	0	0	0	1
503	2022	2021.09-2022.04	Spring	1	59	1	0	1	0	1	1	1	1	1	1	1	1	1	1	1	1	1	1	0	0	0	0	0	0	0	0
504	2022	2021.09-2022.04	Spring	2	1	1	0	1	1	1	1	1	1	1	1	1	1	1	1	1	1	1	1	0	0	0	0	0	0	0	0
505	2022	2021.09-2022.04	Spring	1	53	2	1	0	0	0	0	0	0	0	0	0	1	1	1	1	1	1	1	0	1	0	0	0	0	0	0
506	2022	2021.09-2022.04	Spring	2	66	1	1	0	0	0	2	0	0	0	0	0	1	1	1	1	1	1	1	0	0	0	0	0	0	0	0
507	2022	2021.09-2022.04	Spring	1	82	1	1	0	0	0	1	0	0	0	0	0	1	1	1	0	1	1	1	0	0	1	0	0	0	0	0
Gender	male1	female2
Inpatient	inpatient1	outpatient2	no data 0
MRSA	positive1	negative0
Cefoxitin	sensitive1	negative0	intermedia2
Benzylpenicillin	sensitive1	negative0	intermedia2
Oxacilli	sensitive1	negative0	intermedia2
Gentamicin	sensitive1	negative0	intermedia2
Ciprofloxacin	sensitive1	negative0	intermedia2
Levofloxacin	sensitive1	negative0	intermedia7
Moxifloxacin	sensitive1	negative0	intermedia2
Erythromycin	sensitive1	negative0	intermedia2
Clindamycin	sensitive1	negative0	intermedia2
Quinupristin	sensitive1	negative0	intermedia2
Linezolid	sensitive1	negative0	intermedia2
Vancomycin	sensitive1	negative0	intermedia2
Tetracycline	sensitive1	negative0	intermedia2
Tigecycline	sensitive1	negative0	intermedia2
Nitrofurantoin	sensitive1	negative0	intermedia2
Rifampicin	sensitive1	negative0	intermedia2
mecC	positive1	negative0	no data 2
SCCⅠ	yes 1	no 0
SCCⅡ	yes 1	no 0
SCCⅢ	yes 1	no 0
SCCⅣa	yes 1	no 0
SCCⅣb	yes 1	no 0
SCCⅣc	yes 1	no 0
SCCⅣd	yes 1	no 0
SCCⅤ	yes 1	no 0
